# Supplementary material for: Care Cascade for targeted tuberculosis testing and linkage to Care in Homeless Populations in the United States: a meta-analysis
Source: PubMed Central journal article supplement (PMC5897923; doi:10.1186/s12889-018-5393-x), 2018-04-12

Appendix E: Funnel plots for selected proportions, tuberculin skin test targeted testing among homeless populations in the United States (target line is random effects pooled estimate)

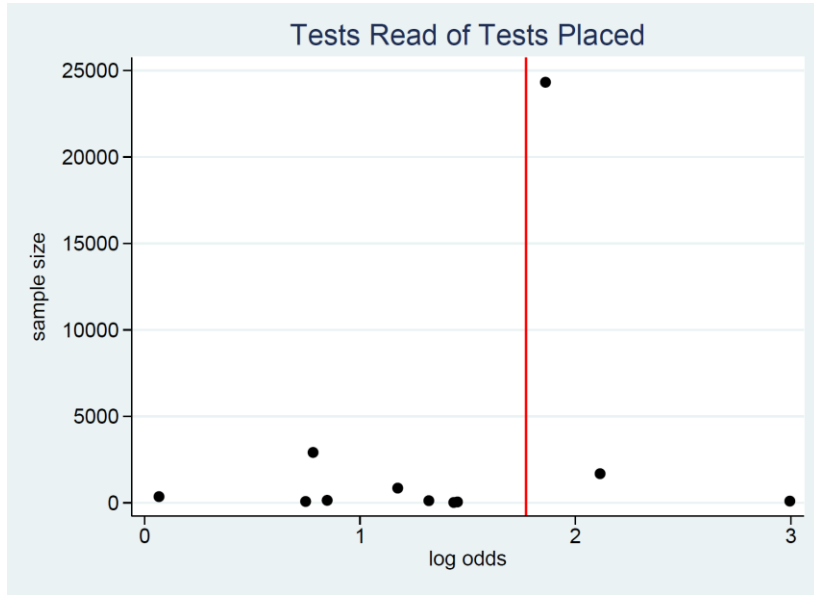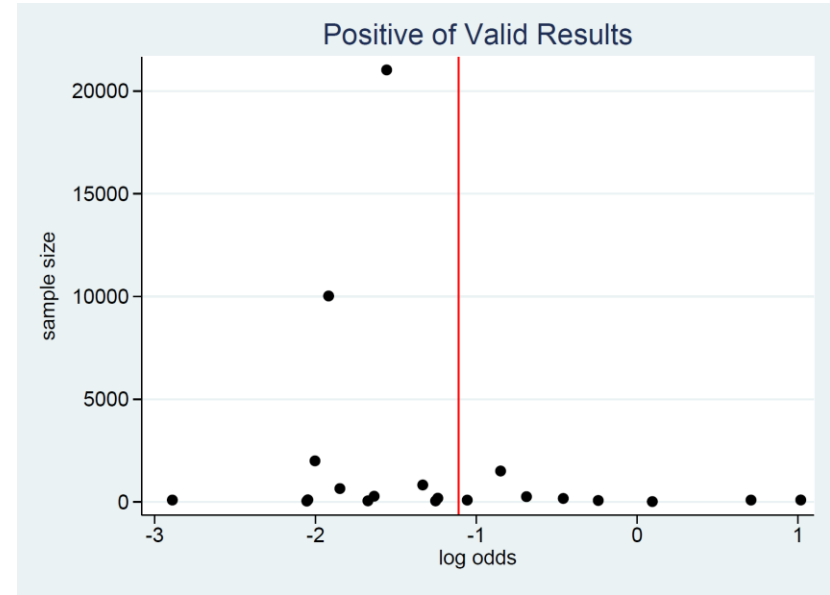

Supplement: 12889_2018_5393_MOESM5_ESM.pdf [file 12889_2018_5393_MOESM5_ESM.pdf]
